# Supplementary material for: Eleven Crucial Pesticides Appear to Regulate Key Genes That Link MPTP Mechanism to Cause Parkinson’s Disease through the Selective Degeneration of Dopamine Neurons
Source: MDPI journal article supplement (doi:10.3390/brainsci13071003), 2023-06-28
Supplement: s1 [file s1]

Supplementary File S1: Proteins involved in the MPTP network.

| Entrez ID | Gene symbol | Description                                                                    |
|-----------|-------------|--------------------------------------------------------------------------------|
| 10347     | ABCA7       | ATP-binding cassette, sub-family A (ABC1), member 7                            |
| 10058     | ABCB6       | ATP-binding cassette, sub-family B (MDR/TAP), member 6 (Langereis blood group) |
| 25        | ABL1        | ABL proto-oncogene 1, non-receptor tyrosine kinase                             |
| 28976     | ACAD9       | acyl-CoA dehydrogenase family, member 9                                        |
| 9744      | ACAP1       | ArfGAP with coiled-coil, ankyrin repeat and PH domains 1                       |
| 53        | ACP2        | acid phosphatase 2, lysosomal                                                  |
| 60        | ACTB        | actin, beta                                                                    |
| 90        | ACVR1       | activin A receptor, type I                                                     |
| 91        | ACVR1B      | activin A receptor, type IB                                                    |
| 130399    | ACVR1C      | activin A receptor, type IC                                                    |
| 92        | ACVR2A      | activin A receptor, type IIA                                                   |
| 93        | ACVR2B      | activin A receptor, type IIB                                                   |
| 94        | ACVRL1      | activin A receptor type II-like 1                                              |
| 102       | ADAM10      | ADAM metallopeptidase domain 10                                                |
| 6868      | ADAM17      | ADAM metallopeptidase domain 17                                                |
| 8754      | ADAM9       | ADAM metallopeptidase domain 9                                                 |
| 119       | ADD2        | adducin 2 (beta)                                                               |
| 22859     | ADGRL1      | adhesion G protein-coupled receptor L1                                         |
| 134       | ADORA1      | adenosine A1 receptor                                                          |
| 154       | ADRB2       | adrenoceptor beta 2, surface                                                   |
| 156       | ADRBK1      | adrenergic, beta, receptor kinase 1                                            |
| 27161     | AGO2        | argonaute RISC catalytic component 2                                           |
| 10598     | AHSA1       | AHA1, activator of heat shock 90kDa protein ATPase homolog 1 (yeast)           |
| 207       | AKT1        | v-akt murine thymoma viral oncogene homolog 1                                  |
| 213       | ALB         | albumin                                                                        |

|        |          |                                                                                         |
|--------|----------|-----------------------------------------------------------------------------------------|
| 221    | ALDH3B1  | aldehyde dehydrogenase 3 family, member B1                                              |
| 84920  | ALG10    | ALG10, alpha-1,2-glucosyltransferase                                                    |
| 238    | ALK      | anaplastic lymphoma receptor tyrosine kinase                                            |
| 239    | ALOX12   | arachidonate 12-lipoxygenase                                                            |
| 269    | AMHR2    | anti-Mullerian hormone receptor, type II                                                |
| 51433  | ANAPC5   | anaphase promoting complex subunit 5                                                    |
| 284    | ANGPT1   | angiopoietin 1                                                                          |
| 23452  | ANGPTL2  | angiopoietin-like 2                                                                     |
| 27329  | ANGPTL3  | angiopoietin-like 3                                                                     |
| 253935 | ANGPTL5  | angiopoietin-like 5                                                                     |
| 286    | ANK1     | ankyrin 1, erythrocytic                                                                 |
| 56899  | ANKS1B   | ankyrin repeat and sterile alpha motif domain containing 1B                             |
| 8907   | AP1M1    | adaptor-related protein complex 1, mu 1 subunit                                         |
| 163    | AP2B1    | adaptor-related protein complex 2, beta 1 subunit                                       |
| 1173   | AP2M1    | adaptor-related protein complex 2, mu 1 subunit                                         |
| 323    | APBB2    | amyloid beta (A4) precursor protein-binding, family B, member 2                         |
| 325    | APCS     | amyloid P component, serum                                                              |
| 338    | APOB     | apolipoprotein B                                                                        |
| 351    | APP      | amyloid beta (A4) precursor protein                                                     |
| 26060  | APPL1    | adaptor protein, phosphotyrosine interaction, PH domain and leucine zipper containing 1 |
| 54840  | APTX     | aprataxin                                                                               |
| 116985 | ARAP1    | ArfGAP with RhoGAP domain, ankyrin repeat and PH domain 1                               |
| 55738  | ARFGAP1  | ADP-ribosylation factor GTPase activating protein 1                                     |
| 55843  | ARHGAP15 | Rho GTPase activating protein 15                                                        |
| 57514  | ARHGAP31 | Rho GTPase activating protein 31                                                        |
| 9743   | ARHGAP32 | Rho GTPase activating protein 32                                                        |
| 2909   | ARHGAP35 | Rho GTPase activating protein 35                                                        |
| 394    | ARHGAP5  | Rho GTPase activating protein 5                                                         |
| 9459   | ARHGEF6  | Rac/Cdc42 guanine nucleotide exchange factor (GEF) 6                                    |
| 285598 | ARL10    | ADP-ribosylation factor-like 10                                                         |

|       |          |                                                                                       |
|-------|----------|---------------------------------------------------------------------------------------|
| 379   | ARL4D    | ADP-ribosylation factor-like 4D                                                       |
| 10550 | ARL6IP5  | ADP-ribosylation factor-like 6 interacting protein 5                                  |
| 55207 | ARL8B    | ADP-ribosylation factor-like 8B                                                       |
| 64860 | ARMCX5   | armadillo repeat containing, X-linked 5                                               |
| 405   | ARNT     | aryl hydrocarbon receptor nuclear translocator                                        |
| 409   | ARRB2    | arrestin, beta 2                                                                      |
| 57561 | ARRDC3   | arrestin domain containing 3                                                          |
| 51666 | ASB4     | ankyrin repeat and SOCS box containing 4                                              |
| 9070  | ASH2L    | ash2 (absent, small, or homeotic)-like (Drosophila)                                   |
| 445   | ASS1     | argininosuccinate synthase 1                                                          |
| 1386  | ATF2     | activating transcription factor 2                                                     |
| 467   | ATF3     | activating transcription factor 3                                                     |
| 476   | ATP1A1   | ATPase, Na <sup>+</sup> /K <sup>+</sup> transporting, alpha 1 polypeptide             |
| 483   | ATP1B3   | ATPase, Na <sup>+</sup> /K <sup>+</sup> transporting, beta 3 polypeptide              |
| 488   | ATP2A2   | ATPase, Ca <sup>++</sup> transporting, cardiac muscle, slow twitch 2                  |
| 506   | ATP5B    | ATP synthase, H <sup>+</sup> transporting, mitochondrial F1 complex, beta polypeptide |
| 515   | ATP5F1   | ATP synthase, H <sup>+</sup> transporting, mitochondrial Fo complex, subunit B1       |
| 10159 | ATP6AP2  | ATPase, H <sup>+</sup> transporting, lysosomal accessory protein 2                    |
| 525   | ATP6V1B1 | ATPase, H <sup>+</sup> transporting, lysosomal 56/58kDa, V1 subunit B1                |
| 6310  | ATXN1    | ataxin 1                                                                              |
| 550   | AUP1     | ancient ubiquitous protein 1                                                          |
| 6790  | AURKA    | aurora kinase A                                                                       |
| 9212  | AURKB    | aurora kinase B                                                                       |
| 551   | AVP      | arginine vasopressin                                                                  |
| 552   | AVPR1A   | arginine vasopressin receptor 1A                                                      |
| 553   | AVPR1B   | arginine vasopressin receptor 1B                                                      |
| 554   | AVPR2    | arginine vasopressin receptor 2                                                       |
| 558   | AXL      | AXL receptor tyrosine kinase                                                          |
| 567   | B2M      | beta-2-microglobulin                                                                  |
| 2683  | B4GALT1  | UDP-Gal:betaGlcNAc beta 1,4- galactosyltransferase, polypeptide 1                     |

|        |          |                                                                        |
|--------|----------|------------------------------------------------------------------------|
| 9334   | B4GALT5  | UDP-Gal:betaGlcNAc beta 1,4- galactosyltransferase, polypeptide 5      |
| 572    | BAD      | BCL2-associated agonist of cell death                                  |
| 9530   | BAG4     | BCL2-associated athanogene 4                                           |
| 7917   | BAG6     | BCL2-associated athanogene 6                                           |
| 55971  | BAIAP2L1 | BAI1-associated protein 2-like 1                                       |
| 25805  | BAMBI    | BMP and activin membrane-bound inhibitor                               |
| 622    | BDH1     | 3-hydroxybutyrate dehydrogenase, type 1                                |
| 627    | BDNF     | brain-derived neurotrophic factor                                      |
| 633    | BGN      | biglycan                                                               |
| 79365  | BHLHE41  | basic helix-loop-helix family, member e41                              |
| 55909  | BIN3     | bridging integrator 3                                                  |
| 329    | BIRC2    | baculoviral IAP repeat containing 2                                    |
| 642    | BLMH     | bleomycin hydrolase                                                    |
| 9210   | BMP15    | bone morphogenetic protein 15                                          |
| 650    | BMP2     | bone morphogenetic protein 2                                           |
| 652    | BMP4     | bone morphogenetic protein 4                                           |
| 654    | BMP6     | bone morphogenetic protein 6                                           |
| 655    | BMP7     | bone morphogenetic protein 7                                           |
| 657    | BMPR1A   | bone morphogenetic protein receptor, type IA                           |
| 658    | BMPR1B   | bone morphogenetic protein receptor, type IB                           |
| 659    | BMPR2    | bone morphogenetic protein receptor, type II (serine/threonine kinase) |
| 79866  | BORA     | bora, aurora kinase A activator                                        |
| 140707 | BRI3BP   | BRI3 binding protein                                                   |
| 55299  | BRX1     | BRX1, biogenesis of ribosomes                                          |
| 25855  | BRMS1    | breast cancer metastasis suppressor 1                                  |
| 684    | BST2     | bone marrow stromal cell antigen 2                                     |
| 55643  | BTBD2    | BTB (POZ) domain containing 2                                          |
| 8945   | BTRC     | beta-transducin repeat containing E3 ubiquitin protein ligase          |
| 148223 | C19orf25 | chromosome 19 open reading frame 25                                    |
| 9847   | C2CD5    | C2 calcium-dependent domain containing 5                               |

|           |          |                                                                   |
|-----------|----------|-------------------------------------------------------------------|
| 205327    | C2orf69  | chromosome 2 open reading frame 69                                |
| 57827     | C6orf47  | chromosome 6 open reading frame 47                                |
| 23705     | CADM1    | cell adhesion molecule 1                                          |
| 796       | CALCA    | calcitonin-related polypeptide alpha                              |
| 799       | CALCR    | calcitonin receptor                                               |
| 801       | CALM1    | calmodulin 1 (phosphorylase kinase, delta)                        |
| 805       | CALM2    | calmodulin 2 (phosphorylase kinase, delta)                        |
| 808       | CALM3    | calmodulin 3 (phosphorylase kinase, delta)                        |
| 55832     | CAND1    | cullin-associated and neddylation-dissociated 1                   |
| 826       | CAPNS1   | calpain, small subunit 1                                          |
| 833       | CARS     | cysteinyI-tRNA synthetase                                         |
| 8573      | CASK     | calcium/calmodulin-dependent serine protein kinase (MAGUK family) |
| 841       | CASP8    | caspase 8, apoptosis-related cysteine peptidase                   |
| 857       | CAV1     | caveolin 1, caveolae protein, 22kDa                               |
| 859       | CAV3     | caveolin 3                                                        |
| 867       | CBL      | Cbl proto-oncogene, E3 ubiquitin protein ligase                   |
| 147872    | CCDC155  | coiled-coil domain containing 155                                 |
| 149483    | CCDC17   | coiled-coil domain containing 17                                  |
| 100133941 | CD24     | CD24 molecule                                                     |
| 919       | CD247    | CD247 molecule                                                    |
| 948       | CD36     | CD36 molecule (thrombospondin receptor)                           |
| 952       | CD38     | CD38 molecule                                                     |
| 920       | CD4      | CD4 molecule                                                      |
| 960       | CD44     | CD44 molecule (Indian blood group)                                |
| 928       | CD9      | CD9 molecule                                                      |
| 991       | CDC20    | cell division cycle 20                                            |
| 11140     | CDC37    | cell division cycle 37                                            |
| 998       | CDC42    | cell division cycle 42                                            |
| 23580     | CDC42EP4 | CDC42 effector protein (Rho GTPase binding) 4                     |
| 983       | CDK1     | cyclin-dependent kinase 1                                         |

|        |        |                                                                                                   |
|--------|--------|---------------------------------------------------------------------------------------------------|
| 5218   | CDK14  | cyclin-dependent kinase 14                                                                        |
| 5128   | CDK17  | cyclin-dependent kinase 17                                                                        |
| 1017   | CDK2   | cyclin-dependent kinase 2                                                                         |
| 1019   | CDK4   | cyclin-dependent kinase 4                                                                         |
| 1021   | CDK6   | cyclin-dependent kinase 6                                                                         |
| 8814   | CDKL1  | cyclin-dependent kinase-like 1 (CDC2-related kinase)                                              |
| 284040 | CDRT4  | CMT1A duplicated region transcript 4                                                              |
| 9425   | CDYL   | chromodomain protein, Y-like                                                                      |
| 1051   | CEBPB  | CCAAT/enhancer binding protein (C/EBP), beta                                                      |
| 1952   | CELSR2 | cadherin, EGF LAG seven-pass G-type receptor 2                                                    |
| 201161 | CENPV  | centromere protein V                                                                              |
| 57562  | CEP126 | centrosomal protein 126kDa                                                                        |
| 91012  | CERS5  | ceramide synthase 5                                                                               |
| 253782 | CERS6  | ceramide synthase 6                                                                               |
| 1080   | CFTR   | cystic fibrosis transmembrane conductance regulator (ATP-binding cassette sub-family C, member 7) |
| 1114   | CHGB   | chromogranin B                                                                                    |
| 1123   | CHN1   | chimerin 1                                                                                        |
| 1124   | CHN2   | chimerin 2                                                                                        |
| 8646   | CHRD   | chordin                                                                                           |
| 1147   | CHUK   | conserved helix-loop-helix ubiquitous kinase                                                      |
| 1179   | CLCA1  | chloride channel accessory 1                                                                      |
| 9635   | CLCA2  | chloride channel accessory 2                                                                      |
| 64581  | CLEC7A | C-type lectin domain family 7, member A                                                           |
| 1195   | CLK1   | CDC-like kinase 1                                                                                 |
| 1201   | CLN3   | ceroid-lipofuscinosis, neuronal 3                                                                 |
| 1191   | CLU    | clusterin                                                                                         |
| 54918  | CMTM6  | CKLF-like MARVEL transmembrane domain containing 6                                                |
| 1268   | CNR1   | cannabinoid receptor 1 (brain)                                                                    |
| 1270   | CNTF   | ciliary neurotrophic factor                                                                       |
| 1272   | CNTN1  | contactin 1                                                                                       |

|       |         |                                                       |
|-------|---------|-------------------------------------------------------|
| 22837 | COBLL1  | cordon-bleu WH2 repeat protein-like 1                 |
| 1308  | COL17A1 | collagen, type XVII, alpha 1                          |
| 80781 | COL18A1 | collagen, type XVIII, alpha 1                         |
| 1277  | COL1A1  | collagen, type I, alpha 1                             |
| 1278  | COL1A2  | collagen, type I, alpha 2                             |
| 1314  | COPA    | coatamer protein complex, subunit alpha               |
| 10987 | COPS5   | COP9 signalosome subunit 5                            |
| 10980 | COPS6   | COP9 signalosome subunit 6                            |
| 1362  | CPD     | carboxypeptidase D                                    |
| 78987 | CRELD1  | cysteine-rich with EGF-like domains 1                 |
| 1392  | CRH     | corticotropin releasing hormone                       |
| 1395  | CRHR2   | corticotropin releasing hormone receptor 2            |
| 1398  | CRK     | v-crck avian sarcoma virus CT10 oncogene homolog      |
| 1399  | CRKL    | v-crck avian sarcoma virus CT10 oncogene homolog-like |
| 1410  | CRYAB   | crystallin, alpha B                                   |
| 1435  | CSF1    | colony stimulating factor 1 (macrophage)              |
| 1445  | CSK     | c-src tyrosine kinase                                 |
| 1452  | CSNK1A1 | casein kinase 1, alpha 1                              |
| 1454  | CSNK1E  | casein kinase 1, epsilon                              |
| 1455  | CSNK1G2 | casein kinase 1, gamma 2                              |
| 1459  | CSNK2A2 | casein kinase 2, alpha prime polypeptide              |
| 1464  | CSPG4   | chondroitin sulfate proteoglycan 4                    |
| 1490  | CTGF    | connective tissue growth factor                       |
| 1499  | CTNNB1  | catenin (cadherin-associated protein), beta 1, 88kDa  |
| 1513  | CTSK    | cathepsin K                                           |
| 8454  | CUL1    | cullin 1                                              |
| 8452  | CUL3    | cullin 3                                              |
| 8065  | CUL5    | cullin 5                                              |
| 9820  | CUL7    | cullin 7                                              |
| 1540  | CYLD    | cylindromatosis (turban tumor syndrome)               |

|        |        |                                                                  |
|--------|--------|------------------------------------------------------------------|
| 1601   | DAB2   | Dab, mitogen-responsive phosphoprotein, homolog 2 (Drosophila)   |
| 1605   | DAG1   | dystroglycan 1 (dystrophin-associated glycoprotein 1)            |
| 1612   | DAPK1  | death-associated protein kinase 1                                |
| 23604  | DAPK2  | death-associated protein kinase 2                                |
| 25853  | DCAF12 | DDB1 and CUL4 associated factor 12                               |
| 55827  | DCAF6  | DDB1 and CUL4 associated factor 6                                |
| 10238  | DCAF7  | DDB1 and CUL4 associated factor 7                                |
| 1634   | DCN    | decorin                                                          |
| 1642   | DDB1   | damage-specific DNA binding protein 1, 127kDa                    |
| 11269  | DDX19B | DEAD (Asp-Glu-Ala-Asp) box polypeptide 19B                       |
| 11218  | DDX20  | DEAD (Asp-Glu-Ala-Asp) box polypeptide 20                        |
| 57062  | DDX24  | DEAD (Asp-Glu-Ala-Asp) box helicase 24                           |
| 317781 | DDX51  | DEAD (Asp-Glu-Ala-Asp) box polypeptide 51                        |
| 55601  | DDX60  | DEAD (Asp-Glu-Ala-Asp) box polypeptide 60                        |
| 23405  | DICER1 | dicer 1, ribonuclease type III                                   |
| 22894  | DIS3   | DIS3 homolog, exosome endoribonuclease and 3'-5' exoribonuclease |
| 1738   | DLD    | dihydrolipoamide dehydrogenase                                   |
| 1739   | DLG1   | discs, large homolog 1 (Drosophila)                              |
| 1740   | DLG2   | discs, large homolog 2 (Drosophila)                              |
| 1742   | DLG4   | discs, large homolog 4 (Drosophila)                              |
| 9231   | DLG5   | discs, large homolog 5 (Drosophila)                              |
| 8788   | DLK1   | delta-like 1 homolog (Drosophila)                                |
| 1746   | DLX2   | distal-less homeobox 2                                           |
| 55172  | DNAAF2 | dynein, axonemal, assembly factor 2                              |
| 55466  | DNAJA4 | DnaJ (Hsp40) homolog, subfamily A, member 4                      |
| 1803   | DPP4   | dipeptidyl-peptidase 4                                           |
| 1829   | DSG2   | desmoglein 2                                                     |
| 667    | DST    | dystonin                                                         |
| 54808  | DYM    | dymeclin                                                         |
| 8444   | DYRK3  | dual-specificity tyrosine-(Y)-phosphorylation regulated kinase 3 |



|        |          |                                                                     |
|--------|----------|---------------------------------------------------------------------|
| 10682  | EBP      | emopamil binding protein (sterol isomerase)                         |
| 51295  | ECSIT    | ECSIT signalling integrator                                         |
| 8726   | EED      | embryonic ectoderm development                                      |
| 1942   | EFNA1    | ephrin-A1                                                           |
| 1948   | EFNB2    | ephrin-B2                                                           |
| 1949   | EFNB3    | ephrin-B3                                                           |
| 1956   | EGFR     | epidermal growth factor receptor                                    |
| 440275 | EIF2AK4  | eukaryotic translation initiation factor 2 alpha kinase 4           |
| 1967   | EIF2B1   | eukaryotic translation initiation factor 2B, subunit 1 alpha, 26kDa |
| 8665   | EIF3F    | eukaryotic translation initiation factor 3, subunit F               |
| 1978   | EIF4EBP1 | eukaryotic translation initiation factor 4E binding protein 1       |
| 3692   | EIF6     | eukaryotic translation initiation factor 6                          |
| 146956 | EME1     | essential meiotic structure-specific endonuclease 1                 |
| 2014   | EMP3     | epithelial membrane protein 3                                       |
| 8507   | ENC1     | ectodermal-neural cortex 1 (with BTB domain)                        |
| 2022   | ENG      | endoglin                                                            |
| 5168   | ENPP2    | ectonucleotide pyrophosphatase/phosphodiesterase 2                  |
| 2033   | EP300    | E1A binding protein p300                                            |
| 2041   | EPHA1    | EPH receptor A1                                                     |
| 1969   | EPHA2    | EPH receptor A2                                                     |
| 2043   | EPHA4    | EPH receptor A4                                                     |
| 29924  | EPN1     | epsin 1                                                             |
| 2060   | EPS15    | epidermal growth factor receptor pathway substrate 15               |
| 51752  | ERAP1    | endoplasmic reticulum aminopeptidase 1                              |
| 2064   | ERBB2    | erb-b2 receptor tyrosine kinase 2                                   |
| 285141 | ERICH2   | glutamate-rich 2                                                    |
| 54206  | ERRF1    | ERBB receptor feedback inhibitor 1                                  |
| 2099   | ESR1     | estrogen receptor 1                                                 |
| 2100   | ESR2     | estrogen receptor 2 (ER beta)                                       |
| 2103   | ESRRB    | estrogen-related receptor beta                                      |

|        |        |                                                                             |
|--------|--------|-----------------------------------------------------------------------------|
| 59271  | EVA1C  | eva-1 homolog C (C. elegans)                                                |
| 2130   | EWSR1  | EWS RNA-binding protein 1                                                   |
| 2146   | EZH2   | enhancer of zeste 2 polycomb repressive complex 2 subunit                   |
| 7430   | EZR    | ezrin                                                                       |
| 2170   | FABP3  | fatty acid binding protein 3, muscle and heart                              |
| 8772   | FADD   | Fas (TNFRSF6)-associated via death domain                                   |
| 23197  | FAF2   | Fas associated factor family member 2                                       |
| 143684 | FAM76B | family with sequence similarity 76, member B                                |
| 55120  | FANCL  | Fanconi anemia, complementation group L                                     |
| 57697  | FANCM  | Fanconi anemia, complementation group M                                     |
| 2191   | FAP    | fibroblast activation protein, alpha                                        |
| 10160  | FARP1  | FERM, RhoGEF (ARHGEF) and pleckstrin domain protein 1 (chondrocyte-derived) |
| 355    | FAS    | Fas cell surface death receptor                                             |
| 54850  | FBXL12 | F-box and leucine-rich repeat protein 12                                    |
| 54620  | FBXL19 | F-box and leucine-rich repeat protein 19                                    |
| 26260  | FBXO25 | F-box protein 25                                                            |
| 55030  | FBXO34 | F-box protein 34                                                            |
| 26270  | FBXO6  | F-box protein 6                                                             |
| 23291  | FBXW11 | F-box and WD repeat domain containing 11                                    |
| 2207   | FCER1G | Fc fragment of IgE, high affinity I, receptor for; gamma polypeptide        |
| 2209   | FCGR1A | Fc fragment of IgG, high affinity Ia, receptor (CD64)                       |
| 2214   | FCGR3A | Fc fragment of IgG, low affinity IIIa, receptor (CD16a)                     |
| 2215   | FCGR3B | Fc fragment of IgG, low affinity IIIb, receptor (CD16b)                     |
| 2246   | FGF1   | fibroblast growth factor 1 (acidic)                                         |
| 8822   | FGF17  | fibroblast growth factor 17                                                 |
| 8817   | FGF18  | fibroblast growth factor 18                                                 |
| 2247   | FGF2   | fibroblast growth factor 2 (basic)                                          |
| 8074   | FGF23  | fibroblast growth factor 23                                                 |
| 2248   | FGF3   | fibroblast growth factor 3                                                  |
| 2249   | FGF4   | fibroblast growth factor 4                                                  |

|        |         |                                                                         |
|--------|---------|-------------------------------------------------------------------------|
| 2250   | FGF5    | fibroblast growth factor 5                                              |
| 2251   | FGF6    | fibroblast growth factor 6                                              |
| 2252   | FGF7    | fibroblast growth factor 7                                              |
| 2253   | FGF8    | fibroblast growth factor 8 (androgen-induced)                           |
| 2254   | FGF9    | fibroblast growth factor 9                                              |
| 2263   | FGFR2   | fibroblast growth factor receptor 2                                     |
| 2261   | FGFR3   | fibroblast growth factor receptor 3                                     |
| 2267   | FGL1    | fibrinogen-like 1                                                       |
| 2280   | FKBP1A  | FK506 binding protein 1A, 12kDa                                         |
| 2316   | FLNA    | filamin A, alpha                                                        |
| 10211  | FLOT1   | flotillin 1                                                             |
| 2324   | FLT4    | fms-related tyrosine kinase 4                                           |
| 2335   | FN1     | fibronectin 1                                                           |
| 22862  | FNDC3A  | fibronectin type III domain containing 3A                               |
| 2339   | FNTA    | farnesyltransferase, CAAX box, alpha                                    |
| 2348   | FOLR1   | folate receptor 1                                                       |
| 2350   | FOLR2   | folate receptor Beta                                                    |
| 2355   | FOSL2   | FOS-like antigen 2                                                      |
| 399823 | FOXI2   | forkhead box I2                                                         |
| 50943  | FOXP3   | forkhead box P3                                                         |
| 283150 | FOXR1   | forkhead box R1                                                         |
| 341640 | FREM2   | FRAS1 related extracellular matrix protein 2                            |
| 2495   | FTH1    | ferritin, heavy polypeptide 1                                           |
| 8880   | FUBP1   | far upstream element (FUSE) binding protein 1                           |
| 5045   | FURIN   | furin (paired basic amino acid cleaving enzyme)                         |
| 2526   | FUT4    | fucosyltransferase 4 (alpha (1,3) fucosyltransferase, myeloid-specific) |
| 2534   | FYN     | FYN proto-oncogene, Src family tyrosine kinase                          |
| 8324   | FZD7    | frizzled class receptor 7                                               |
| 11337  | GABARAP | GABA(A) receptor-associated protein                                     |
| 2597   | GAPDH   | glyceraldehyde-3-phosphate dehydrogenase                                |

|        |        |                                                                                         |
|--------|--------|-----------------------------------------------------------------------------------------|
| 2621   | GAS6   | growth arrest-specific 6                                                                |
| 8200   | GDF5   | growth differentiation factor 5                                                         |
| 392255 | GDF6   | growth differentiation factor 6                                                         |
| 2661   | GDF9   | growth differentiation factor 9                                                         |
| 50628  | GEMIN4 | gem (nuclear organelle) associated protein 4                                            |
| 79833  | GEMIN6 | gem (nuclear organelle) associated protein 6                                            |
| 79760  | GEMIN7 | gem (nuclear organelle) associated protein 7                                            |
| 54960  | GEMIN8 | gem (nuclear organelle) associated protein 8                                            |
| 2670   | GFAP   | glial fibrillary acidic protein                                                         |
| 26088  | GGA1   | golgi-associated, gamma adaptin ear containing, ARF binding protein 1                   |
| 23062  | GGA2   | golgi-associated, gamma adaptin ear containing, ARF binding protein 2                   |
| 23163  | GGA3   | golgi-associated, gamma adaptin ear containing, ARF binding protein 3                   |
| 10755  | GIPC1  | GIPC PDZ domain containing family, member 1                                             |
| 28964  | GIT1   | G protein-coupled receptor kinase interacting ArfGAP 1                                  |
| 2706   | GJB2   | gap junction protein, beta 2, 26kDa                                                     |
| 2710   | GK     | glycerol kinase                                                                         |
| 2744   | GLS    | glutaminase                                                                             |
| 2752   | GLUL   | glutamate-ammonia ligase                                                                |
| 2767   | GNA11  | guanine nucleotide binding protein (G protein), alpha 11 (Gq class)                     |
| 10672  | GNA13  | guanine nucleotide binding protein (G protein), alpha 13                                |
| 2769   | GNA15  | guanine nucleotide binding protein (G protein), alpha 15 (Gq class)                     |
| 2770   | GNAI1  | guanine nucleotide binding protein (G protein), alpha inhibiting activity polypeptide 1 |
| 2771   | GNAI2  | guanine nucleotide binding protein (G protein), alpha inhibiting activity polypeptide 2 |
| 2776   | GNAQ   | guanine nucleotide binding protein (G protein), q polypeptide                           |
| 2783   | GNB2   | guanine nucleotide binding protein (G protein), beta polypeptide 2                      |
| 2784   | GNB3   | guanine nucleotide binding protein (G protein), beta polypeptide 3                      |
| 2802   | GOLGA3 | golgin A3                                                                               |
| 9950   | GOLGA5 | golgin A5                                                                               |
| 64083  | GOLPH3 | golgi phosphoprotein 3 (coat-protein)                                                   |
| 51026  | GOLT1B | golgi transport 1B                                                                      |

|        |          |                                                                             |
|--------|----------|-----------------------------------------------------------------------------|
| 2811   | GP1BA    | glycoprotein Ib (platelet), alpha polypeptide                               |
| 51206  | GP6      | glycoprotein VI (platelet)                                                  |
| 65056  | GPBP1    | GC-rich promoter binding protein 1                                          |
| 653519 | GPR89A   | G protein-coupled receptor 89A                                              |
| 51463  | GPR89B   | G protein-coupled receptor 89B                                              |
| 9737   | GPRASP1  | G protein-coupled receptor associated sorting protein 1                     |
| 114928 | GPRASP2  | G protein-coupled receptor associated sorting protein 2                     |
| 63940  | GPSM3    | G-protein signaling modulator 3                                             |
| 57655  | GRAMD1A  | GRAM domain containing 1A                                                   |
| 160622 | GRASP    | GRP1 (general receptor for phosphoinositides 1)-associated scaffold protein |
| 2888   | GRB14    | growth factor receptor-bound protein 14                                     |
| 2885   | GRB2     | growth factor receptor-bound protein 2                                      |
| 23426  | GRIP1    | glutamate receptor interacting protein 1                                    |
| 2870   | GRK6     | G protein-coupled receptor kinase 6                                         |
| 2911   | GRM1     | glutamate receptor, metabotropic 1                                          |
| 2912   | GRM2     | glutamate receptor, metabotropic 2                                          |
| 2918   | GRM8     | glutamate receptor, metabotropic 8                                          |
| 2896   | GRN      | granulin                                                                    |
| 2936   | GSR      | glutathione reductase                                                       |
| 9569   | GTF2IRD1 | GTF2I repeat domain containing 1                                            |
| 2975   | GTF3C1   | general transcription factor IIIC, polypeptide 1, alpha 220kDa              |
| 60558  | GUF1     | GUF1 homolog, GTPase                                                        |
| 3020   | H3F3A    | H3 histone, family 3A                                                       |
| 3021   | H3F3B    | H3 histone, family 3B (H3.3B)                                               |
| 3050   | HBZ      | hemoglobin, zeta                                                            |
| 10870  | HCST     | hematopoietic cell signal transducer                                        |
| 10014  | HDAC5    | histone deacetylase 5                                                       |
| 253012 | HEPACAM2 | HEPACAM family member 2                                                     |
| 3077   | HFE      | hemochromatosis                                                             |
| 9146   | HGS      | hepatocyte growth factor-regulated tyrosine kinase substrate                |

|        |          |                                                                                          |
|--------|----------|------------------------------------------------------------------------------------------|
| 3024   | HIST1H1A | histone cluster 1, H1a                                                                   |
| 3009   | HIST1H1B | histone cluster 1, H1b                                                                   |
| 3006   | HIST1H1C | histone cluster 1, H1c                                                                   |
| 3007   | HIST1H1D | histone cluster 1, H1d                                                                   |
| 3008   | HIST1H1E | histone cluster 1, H1e                                                                   |
| 3010   | HIST1H1T | histone cluster 1, H1t                                                                   |
| 3106   | HLA-B    | major histocompatibility complex, class I, B                                             |
| 3107   | HLA-C    | major histocompatibility complex, class I, C                                             |
| 3113   | HLA-DPA1 | major histocompatibility complex, class II, DP alpha 1                                   |
| 3134   | HLA-F    | major histocompatibility complex, class I, F                                             |
| 3135   | HLA-G    | major histocompatibility complex, class I, G                                             |
| 3146   | HMGB1    | high mobility group box 1                                                                |
| 3161   | HMMR     | hyaluronan-mediated motility receptor (RHAMM)                                            |
| 3184   | HNRNPD   | heterogeneous nuclear ribonucleoprotein D (AU-rich element RNA binding protein 1, 37kDa) |
| 3191   | HNRNPL   | heterogeneous nuclear ribonucleoprotein L                                                |
| 3192   | HNRNPU   | heterogeneous nuclear ribonucleoprotein U (scaffold attachment factor A)                 |
| 9456   | HOMER1   | homer scaffolding protein 1                                                              |
| 9455   | HOMER2   | homer scaffolding protein 2                                                              |
| 3240   | HP       | haptoglobin                                                                              |
| 90161  | HS6ST2   | heparan sulfate 6-O-sulfotransferase 2                                                   |
| 3290   | HSD11B1  | hydroxysteroid (11-beta) dehydrogenase 1                                                 |
| 3295   | HSD17B4  | hydroxysteroid (17-beta) dehydrogenase 4                                                 |
| 3320   | HSP90AA1 | heat shock protein 90kDa alpha (cytosolic), class A member 1                             |
| 3326   | HSP90AB1 | heat shock protein 90kDa alpha (cytosolic), class B member 1                             |
| 259217 | HSPA12A  | heat shock 70kDa protein 12A                                                             |
| 6782   | HSPA13   | heat shock protein 70kDa family, member 13                                               |
| 3303   | HSPA1A   | heat shock 70kDa protein 1A                                                              |
| 3304   | HSPA1B   | heat shock 70kDa protein 1B                                                              |
| 3308   | HSPA4    | heat shock 70kDa protein 4                                                               |
| 3312   | HSPA8    | heat shock 70kDa protein 8                                                               |

|       |         |                                                                               |
|-------|---------|-------------------------------------------------------------------------------|
| 3356  | HTR2A   | 5-hydroxytryptamine (serotonin) receptor 2A, G protein-coupled                |
| 3064  | HTT     | huntingtin                                                                    |
| 10075 | HUWE1   | HECT, UBA and WWE domain containing 1, E3 ubiquitin protein ligase            |
| 3383  | ICAM1   | intercellular adhesion molecule 1                                             |
| 7087  | ICAM5   | intercellular adhesion molecule 5, telencephalin                              |
| 79664 | ICE2    | interactor of little elongation complex ELL subunit 2                         |
| 29851 | ICOS    | inducible T-cell co-stimulator                                                |
| 3458  | IFNG    | interferon, gamma                                                             |
| 3547  | IGSF1   | immunoglobulin superfamily, member 1                                          |
| 3551  | IKBKB   | inhibitor of kappa light polypeptide gene enhancer in B-cells, kinase beta    |
| 9641  | IKBKE   | inhibitor of kappa light polypeptide gene enhancer in B-cells, kinase epsilon |
| 8517  | IKBKG   | inhibitor of kappa light polypeptide gene enhancer in B-cells, kinase gamma   |
| 3596  | IL13    | interleukin 13                                                                |
| 3597  | IL13RA1 | interleukin 13 receptor, alpha 1                                              |
| 3601  | IL15RA  | interleukin 15 receptor, alpha                                                |
| 3554  | IL1R1   | interleukin 1 receptor, type I                                                |
| 9173  | IL1RL1  | interleukin 1 receptor-like 1                                                 |
| 3558  | IL2     | interleukin 2                                                                 |
| 3559  | IL2RA   | interleukin 2 receptor, alpha                                                 |
| 3560  | IL2RB   | interleukin 2 receptor, beta                                                  |
| 3561  | IL2RG   | interleukin 2 receptor, gamma                                                 |
| 90865 | IL33    | interleukin 33                                                                |
| 3565  | IL4     | interleukin 4                                                                 |
| 3566  | IL4R    | interleukin 4 receptor                                                        |
| 3569  | IL6     | interleukin 6                                                                 |
| 3570  | IL6R    | interleukin 6 receptor                                                        |
| 3572  | IL6ST   | interleukin 6 signal transducer                                               |
| 3611  | ILK     | integrin-linked kinase                                                        |
| 80895 | ILKAP   | integrin-linked kinase-associated serine/threonine phosphatase                |
| 3615  | IMPDH2  | IMP (inosine 5'-monophosphate) dehydrogenase 2                                |

|       |        |                                                                                              |
|-------|--------|----------------------------------------------------------------------------------------------|
| 3624  | INHBA  | inhibin, beta A                                                                              |
| 3625  | INHBB  | inhibin, beta B                                                                              |
| 3626  | INHBC  | inhibin, beta C                                                                              |
| 3636  | INPPL1 | inositol polyphosphate phosphatase-like 1                                                    |
| 80789 | INTS5  | integrator complex subunit 5                                                                 |
| 51194 | IPO11  | importin 11                                                                                  |
| 55705 | IPO9   | importin 9                                                                                   |
| 3654  | IRAK1  | interleukin-1 receptor-associated kinase 1                                                   |
| 3656  | IRAK2  | interleukin-1 receptor-associated kinase 2                                                   |
| 11213 | IRAK3  | interleukin-1 receptor-associated kinase 3                                                   |
| 51135 | IRAK4  | interleukin-1 receptor-associated kinase 4                                                   |
| 3661  | IRF3   | interferon regulatory factor 3                                                               |
| 83737 | ITCH   | itchy E3 ubiquitin protein ligase                                                            |
| 3674  | ITGA2B | integrin, alpha 2b (platelet glycoprotein IIb of IIb/IIIa complex, antigen CD41)             |
| 3675  | ITGA3  | integrin, alpha 3 (antigen CD49C, alpha 3 subunit of VLA-3 receptor)                         |
| 3676  | ITGA4  | integrin, alpha 4 (antigen CD49D, alpha 4 subunit of VLA-4 receptor)                         |
| 3678  | ITGA5  | integrin, alpha 5 (fibronectin receptor, alpha polypeptide)                                  |
| 3655  | ITGA6  | integrin, alpha 6                                                                            |
| 3685  | ITGAV  | integrin, alpha V                                                                            |
| 3688  | ITGB1  | integrin, beta 1 (fibronectin receptor, beta polypeptide, antigen CD29 includes MDF2, MSK12) |
| 3690  | ITGB3  | integrin, beta 3 (platelet glycoprotein IIIa, antigen CD61)                                  |
| 3691  | ITGB4  | integrin, beta 4                                                                             |
| 3693  | ITGB5  | integrin, beta 5                                                                             |
| 3698  | ITIH2  | inter-alpha-trypsin inhibitor heavy chain 2                                                  |
| 3702  | ITK    | IL2-inducible T-cell kinase                                                                  |
| 3708  | ITPR1  | inositol 1,4,5-trisphosphate receptor, type 1                                                |
| 3709  | ITPR2  | inositol 1,4,5-trisphosphate receptor, type 2                                                |
| 3716  | JAK1   | Janus kinase 1                                                                               |
| 3717  | JAK2   | Janus kinase 2                                                                               |
| 3728  | JUP    | junction plakoglobin                                                                         |



|           |             |                                                                                 |
|-----------|-------------|---------------------------------------------------------------------------------|
| 10300     | KATNB1      | katanin p80 (WD repeat containing) subunit B 1                                  |
| 3738      | KCNA3       | potassium channel, voltage gated shaker related subfamily A, member 3           |
| 3741      | KCNA5       | potassium channel, voltage gated shaker related subfamily A, member 5           |
| 338567    | KCNK18      | potassium channel, two pore domain subfamily K, member 18                       |
| 79932     | KIAA0319L   | KIAA0319-like                                                                   |
| 57179     | KIAA1191    | KIAA1191                                                                        |
| 90231     | KIAA2013    | KIAA2013                                                                        |
| 3832      | KIF11       | kinesin family member 11                                                        |
| 3805      | KIR2DL4     | killer cell immunoglobulin-like receptor, two domains, long cytoplasmic tail, 4 |
| 3815      | KIT         | v-kit Hardy-Zuckerman 4 feline sarcoma viral oncogene homolog                   |
| 3831      | KLC1        | kinesin light chain 1                                                           |
| 147700    | KLC3        | kinesin light chain 3                                                           |
| 23588     | KLHDC2      | kelch domain containing 2                                                       |
| 57626     | KLHL1       | kelch-like family member 1                                                      |
| 283212    | KLHL35      | kelch-like family member 35                                                     |
| 100528032 | KLRC4-KLRK1 | KLRC4-KLRK1 readthrough                                                         |
| 10219     | KLRG1       | killer cell lectin-like receptor subfamily G, member 1                          |
| 22914     | KLRK1       | killer cell lectin-like receptor subfamily K, member 1                          |
| 4297      | KMT2A       | lysine (K)-specific methyltransferase 2A                                        |
| 3836      | KPNA1       | karyopherin alpha 1 (importin alpha 5)                                          |
| 3839      | KPNA3       | karyopherin alpha 3 (importin alpha 4)                                          |
| 3881      | KRT31       | keratin 31, type I                                                              |
| 9119      | KRT75       | keratin 75, type II                                                             |
| 3856      | KRT8        | keratin 8, type II                                                              |
| 386681    | KRTAP10-8   | keratin associated protein 10-8                                                 |
| 3897      | L1CAM       | L1 cell adhesion molecule                                                       |
| 3920      | LAMP2       | lysosomal-associated membrane protein 2                                         |
| 10542     | LAMTOR5     | late endosomal/lysosomal adaptor, MAPK and MTOR activator 5                     |
| 9741      | LAPTM4A     | lysosomal protein transmembrane 4 alpha                                         |
| 55353     | LAPTM4B     | lysosomal protein transmembrane 4 beta                                          |

|        |          |                                                                                          |
|--------|----------|------------------------------------------------------------------------------------------|
| 3932   | LCK      | LCK proto-oncogene, Src family tyrosine kinase                                           |
| 3949   | LDLR     | low density lipoprotein receptor                                                         |
| 221496 | LEMD2    | LEM domain containing 2                                                                  |
| 23484  | LEPROTL1 | leptin receptor overlapping transcript-like 1                                            |
| 3958   | LGALS3   | lectin, galactoside-binding, soluble, 3                                                  |
| 3959   | LGALS3BP | lectin, galactoside-binding, soluble, 3 binding protein                                  |
| 3964   | LGALS8   | lectin, galactoside-binding, soluble, 8                                                  |
| 3965   | LGALS9   | lectin, galactoside-binding, soluble, 9                                                  |
| 55366  | LGR4     | leucine-rich repeat containing G protein-coupled receptor 4                              |
| 11024  | LILRA1   | leukocyte immunoglobulin-like receptor, subfamily A (with TM domain), member 1           |
| 11026  | LILRA3   | leukocyte immunoglobulin-like receptor, subfamily A (without TM domain), member 3        |
| 10859  | LILRB1   | leukocyte immunoglobulin-like receptor, subfamily B (with TM and ITIM domains), member 1 |
| 10288  | LILRB2   | leukocyte immunoglobulin-like receptor, subfamily B (with TM and ITIM domains), member 2 |
| 3987   | LIMS1    | LIM and senescent cell antigen-like domains 1                                            |
| 132660 | LIN54    | lin-54 DREAM MuvB core complex component                                                 |
| 84894  | LINGO1   | leucine rich repeat and Ig domain containing 1                                           |
| 64327  | LMBR1    | limb development membrane protein 1                                                      |
| 55885  | LMO3     | LIM domain only 3 (rhombotin-like 2)                                                     |
| 22853  | LMTK2    | lemur tyrosine kinase 2                                                                  |
| 4012   | LNPEP    | leucyl/cystinyl aminopeptidase                                                           |
| 1902   | LPAR1    | lysophosphatidic acid receptor 1                                                         |
| 4023   | LPL      | lipoprotein lipase                                                                       |
| 116844 | LRG1     | leucine-rich alpha-2-glycoprotein 1                                                      |
| 55791  | LRIF1    | ligand dependent nuclear receptor interacting factor 1                                   |
| 4035   | LRP1     | low density lipoprotein receptor-related protein 1                                       |
| 4043   | LRPAP1   | low density lipoprotein receptor-related protein associated protein 1                    |
| 26065  | LSM14A   | LSM14A mRNA processing body assembly factor                                              |
| 4049   | LTA      | lymphotoxin alpha                                                                        |
| 4055   | LTBR     | lymphotoxin beta receptor (TNFR superfamily, member 3)                                   |
| 4067   | LYN      | LYN proto-oncogene, Src family tyrosine kinase                                           |

|           |        |                                                                               |
|-----------|--------|-------------------------------------------------------------------------------|
| 8216      | LZTR1  | leucine-zipper-like transcription regulator 1                                 |
| 23499     | MACF1  | microtubule-actin crosslinking factor 1                                       |
| 4099      | MAG    | myelin associated glycoprotein                                                |
| 9223      | MAG11  | membrane associated guanylate kinase, WW and PDZ domain containing 1          |
| 260425    | MAG13  | membrane associated guanylate kinase, WW and PDZ domain containing 3          |
| 84549     | MAK16  | MAK16 homolog                                                                 |
| 4130      | MAP1A  | microtubule-associated protein 1A                                             |
| 5605      | MAP2K2 | mitogen-activated protein kinase kinase 2                                     |
| 4214      | MAP3K1 | mitogen-activated protein kinase kinase kinase 1, E3 ubiquitin protein ligase |
| 4216      | MAP3K4 | mitogen-activated protein kinase kinase kinase 4                              |
| 6885      | MAP3K7 | mitogen-activated protein kinase kinase kinase 7                              |
| 1432      | MAPK14 | mitogen-activated protein kinase 14                                           |
| 5597      | MAPK6  | mitogen-activated protein kinase 6                                            |
| 4145      | MATK   | megakaryocyte-associated tyrosine kinase                                      |
| 4153      | MBL2   | mannose-binding lectin (protein C) 2, soluble                                 |
| 4155      | MBP    | myelin basic protein                                                          |
| 4163      | MCC    | mutated in colorectal cancers                                                 |
| 4192      | MDK    | midkine (neurite growth-promoting factor 2)                                   |
| 5469      | MED1   | mediator complex subunit 1                                                    |
| 23389     | MED13L | mediator complex subunit 13-like                                              |
| 4223      | MEOX2  | mesenchyme homeobox 2                                                         |
| 4224      | MEP1A  | meprin A, alpha (PABA peptide hydrolase)                                      |
| 4233      | MET    | MET proto-oncogene, receptor tyrosine kinase                                  |
| 256471    | MFSD8  | major facilitator superfamily domain containing 8                             |
| 375056    | MIA3   | melanoma inhibitory activity family, member 3                                 |
| 100507436 | MICA   | MHC class I polypeptide-related sequence A                                    |
| 4277      | MICB   | MHC class I polypeptide-related sequence B                                    |
| 4291      | MLF1   | myeloid leukemia factor 1                                                     |
| 4301      | MLLT4  | myeloid/lymphoid or mixed-lineage leukemia; translocated to, 4                |
| 4311      | MME    | membrane metallo-endopeptidase                                                |

|        |          |                                                                  |
|--------|----------|------------------------------------------------------------------|
| 4326   | MMP17    | matrix metalloproteinase 17 (membrane-inserted)                  |
| 22880  | MORC2    | MORC family CW-type zinc finger 2                                |
| 8777   | MPDZ     | multiple PDZ domain protein                                      |
| 10200  | MPHOSPH6 | M-phase phosphoprotein 6                                         |
| 51678  | MPP6     | membrane protein, palmitoylated 6 (MAGUK p55 subfamily member 6) |
| 9902   | MRC2     | mannose receptor, C type 2                                       |
| 79922  | MRM1     | mitochondrial rRNA methyltransferase 1                           |
| 79590  | MRPL24   | mitochondrial ribosomal protein L24                              |
| 10573  | MRPL28   | mitochondrial ribosomal protein L28                              |
| 128308 | MRPL55   | mitochondrial ribosomal protein L55                              |
| 57380  | MRS2     | MRS2 magnesium transporter                                       |
| 345778 | MTX3     | metaxin 3                                                        |
| 80198  | MUS81    | MUS81 structure-specific endonuclease subunit                    |
| 23077  | MYCBP2   | MYC binding protein 2, E3 ubiquitin protein ligase               |
| 4615   | MYD88    | myeloid differentiation primary response 88                      |
| 4619   | MYH1     | myosin, heavy chain 1, skeletal muscle, adult                    |
| 8735   | MYH13    | myosin, heavy chain 13, skeletal muscle                          |
| 4624   | MYH6     | myosin, heavy chain 6, cardiac muscle, alpha                     |
| 80179  | MYO19    | myosin XIX                                                       |
| 4641   | MYO1C    | myosin IC                                                        |
| 64005  | MYO1G    | myosin IG                                                        |
| 53904  | MYO3A    | myosin IIIA                                                      |
| 4653   | MYOC     | myocilin, trabecular meshwork inducible glucocorticoid response  |
| 4654   | MYOD1    | myogenic differentiation 1                                       |
| 254827 | NAALADL2 | N-acetylated alpha-linked acidic dipeptidase-like 2              |
| 4677   | NARS     | asparaginyl-tRNA synthetase                                      |
| 9027   | NAT8     | N-acetyltransferase 8 (GCN5-related, putative)                   |
| 29781  | NCAPH2   | non-SMC condensin II complex, subunit H2                         |
| 4690   | NCK1     | NCK adaptor protein 1                                            |
| 8440   | NCK2     | NCK adaptor protein 2                                            |

|        |           |                                                                                                     |
|--------|-----------|-----------------------------------------------------------------------------------------------------|
| 56926  | NCLN      | nicalin                                                                                             |
| 8648   | NCOA1     | nuclear receptor coactivator 1                                                                      |
| 10499  | NCOA2     | nuclear receptor coactivator 2                                                                      |
| 374383 | NCR3LG1   | natural killer cell cytotoxicity receptor 3 ligand 1                                                |
| 81565  | NDEL1     | nudE neurodevelopment protein 1-like 1                                                              |
| 4716   | NDUFB10   | NADH dehydrogenase (ubiquinone) 1 beta subcomplex, 10, 22kDa                                        |
| 4711   | NDUFB5    | NADH dehydrogenase (ubiquinone) 1 beta subcomplex, 5, 16kDa                                         |
| 4726   | NDUFS6    | NADH dehydrogenase (ubiquinone) Fe-S protein 6, 13kDa (NADH-coenzyme Q reductase)                   |
| 23327  | NEDD4L    | neural precursor cell expressed, developmentally down-regulated 4-like, E3 ubiquitin protein ligase |
| 4747   | NEFL      | neurofilament, light polypeptide                                                                    |
| 10783  | NEK6      | NIMA-related kinase 6                                                                               |
| 140609 | NEK7      | NIMA-related kinase 7                                                                               |
| 284086 | NEK8      | NIMA-related kinase 8                                                                               |
| 4756   | NEO1      | neogenin 1                                                                                          |
| 4790   | NFKB1     | nuclear factor of kappa light polypeptide gene enhancer in B-cells 1                                |
| 4792   | NFKBIA    | nuclear factor of kappa light polypeptide gene enhancer in B-cells inhibitor, alpha                 |
| 4803   | NGF       | nerve growth factor (beta polypeptide)                                                              |
| 4804   | NGFR      | nerve growth factor receptor                                                                        |
| 4810   | NHS       | Nance-Horan syndrome (congenital cataracts and dental anomalies)                                    |
| 11188  | NISCH     | nischarin                                                                                           |
| 28512  | NKIRAS1   | NFKB inhibitor interacting Ras-like 1                                                               |
| 22871  | NLGN1     | neuroligin 1                                                                                        |
| 57555  | NLGN2     | neuroligin 2                                                                                        |
| 54413  | NLGN3     | neuroligin 3                                                                                        |
| 4830   | NME1      | NME/NM23 nucleoside diphosphate kinase 1                                                            |
| 654364 | NME1-NME2 | NME1-NME2 readthrough                                                                               |
| 4831   | NME2      | NME/NM23 nucleoside diphosphate kinase 2                                                            |
| 4832   | NME3      | NME/NM23 nucleoside diphosphate kinase 3                                                            |
| 65083  | NOL6      | nucleolar protein 6 (RNA-associated)                                                                |
| 4839   | NOP2      | NOP2 nucleolar protein                                                                              |

|           |         |                                                           |
|-----------|---------|-----------------------------------------------------------|
| 4851      | NOTCH1  | notch 1                                                   |
| 4869      | NPM1    | nucleophosmin (nucleolar phosphoprotein B23, numatrin)    |
| 190       | NR0B1   | nuclear receptor subfamily 0, group B, member 1           |
| 8829      | NRP1    | neuropilin 1                                              |
| 9379      | NRXN2   | neurexin 2                                                |
| 64324     | NSD1    | nuclear receptor binding SET domain protein 1             |
| 286053    | NSMCE2  | non-SMC element 2, MMS21 homolog ( <i>S. cerevisiae</i> ) |
| 51559     | NT5DC3  | 5'-nucleotidase domain containing 3                       |
| 9423      | NTN1    | netrin 1                                                  |
| 4914      | NTRK1   | neurotrophic tyrosine kinase, receptor, type 1            |
| 4915      | NTRK2   | neurotrophic tyrosine kinase, receptor, type 2            |
| 4916      | NTRK3   | neurotrophic tyrosine kinase, receptor, type 3            |
| 4922      | NTS     | neurotensin                                               |
| 81788     | NUAK2   | NUAK family, SNF1-like kinase, 2                          |
| 23386     | NUDCD3  | NudC domain containing 3                                  |
| 79023     | NUP37   | nucleoporin 37kDa                                         |
| 8638      | OASL    | 2'-5'-oligoadenylate synthetase-like                      |
| 100506658 | OCLN    | occludin                                                  |
| 4974      | OMG     | oligodendrocyte myelin glycoprotein                       |
| 10133     | OPTN    | optineurin                                                |
| 10956     | OS9     | osteosarcoma amplified 9, endoplasmic reticulum lectin    |
| 130497    | OSR1    | odd-skipped related transcription factor 1                |
| 55611     | OTUB1   | OTU deubiquitinase, ubiquitin aldehyde binding 1          |
| 90268     | OTULIN  | OTU deubiquitinase with linear linkage specificity        |
| 9943      | OXSRI   | oxidative stress responsive 1                             |
| 5021      | OXTR    | oxytocin receptor                                         |
| 5027      | P2RX7   | purinergic receptor P2X, ligand gated ion channel, 7      |
| 64805     | P2RY12  | purinergic receptor P2Y, G-protein coupled, 12            |
| 55690     | PACS1   | phosphofurin acidic cluster sorting protein 1             |
| 29763     | PACSLN3 | protein kinase C and casein kinase substrate in neurons 3 |

|        |        |                                                            |
|--------|--------|------------------------------------------------------------|
| 5058   | PAK1   | p21 protein (Cdc42/Rac)-activated kinase 1                 |
| 79728  | PALB2  | partner and localizer of BRCA2                             |
| 54873  | PALMD  | palmdelphin                                                |
| 24145  | PANX1  | pannexin 1                                                 |
| 64282  | PAPD5  | PAP associated domain containing 5                         |
| 50855  | PARD6A | par-6 family cell polarity regulator alpha                 |
| 5071   | PARK2  | parkin RBR E3 ubiquitin protein ligase                     |
| 83666  | PARP9  | poly (ADP-ribose) polymerase family, member 9              |
| 23178  | PASK   | PAS domain containing serine/threonine kinase              |
| 5076   | PAX2   | paired box 2                                               |
| 5099   | PCDH7  | protocadherin 7                                            |
| 201626 | PDE12  | phosphodiesterase 12                                       |
| 5154   | PDGFA  | platelet-derived growth factor alpha polypeptide           |
| 5155   | PDGFB  | platelet-derived growth factor beta polypeptide            |
| 56034  | PDGFC  | platelet derived growth factor C                           |
| 5156   | PDGFRA | platelet-derived growth factor receptor, alpha polypeptide |
| 5159   | PDGFRB | platelet-derived growth factor receptor, beta polypeptide  |
| 149420 | PDIK1L | PDLIM1 interacting kinase 1 like                           |
| 79834  | PEAK1  | pseudopodium-enriched atypical kinase 1                    |
| 5175   | PECAM1 | platelet/endothelial cell adhesion molecule 1              |
| 23089  | PEG10  | paternally expressed 10                                    |
| 57162  | PELI1  | pellino E3 ubiquitin protein ligase 1                      |
| 57161  | PELI2  | pellino E3 ubiquitin protein ligase family member 2        |
| 246330 | PELI3  | pellino E3 ubiquitin protein ligase family member 3        |
| 1912   | PHC2   | polyhomeotic homolog 2 (Drosophila)                        |
| 90102  | PHLDB2 | pleckstrin homology-like domain, family B, member 2        |
| 5297   | PI4KA  | phosphatidylinositol 4-kinase, catalytic, alpha            |
| 8554   | PIAS1  | protein inhibitor of activated STAT, 1                     |
| 9063   | PIAS2  | protein inhibitor of activated STAT, 2                     |
| 5295   | PIK3R1 | phosphoinositide-3-kinase, regulatory subunit 1 (alpha)    |

|        |          |                                                                       |
|--------|----------|-----------------------------------------------------------------------|
| 5296   | PIK3R2   | phosphoinositide-3-kinase, regulatory subunit 2 (beta)                |
| 8503   | PIK3R3   | phosphoinositide-3-kinase, regulatory subunit 3 (gamma)               |
| 5331   | PLCB3    | phospholipase C, beta 3 (phosphatidylinositol-specific)               |
| 5335   | PLCG1    | phospholipase C, gamma 1                                              |
| 5339   | PLEC     | plectin                                                               |
| 5341   | PLEK     | pleckstrin                                                            |
| 58473  | PLEKHB1  | pleckstrin homology domain containing, family B (evectins) member 1   |
| 55111  | PLEKHJ1  | pleckstrin homology domain containing, family J member 1              |
| 10733  | PLK4     | polo-like kinase 4                                                    |
| 5362   | PLXNA2   | plexin A2                                                             |
| 91584  | PLXNA4   | plexin A4                                                             |
| 5371   | PML      | promyelocytic leukemia                                                |
| 10957  | PNRC1    | proline-rich nuclear receptor coactivator 1                           |
| 55629  | PNRC2    | proline-rich nuclear receptor coactivator 2                           |
| 134359 | POC5     | POC5 centriolar protein                                               |
| 23649  | POLA2    | polymerase (DNA directed), alpha 2, accessory subunit                 |
| 84197  | POMK     | protein-O-mannose kinase                                              |
| 5445   | PON2     | paraoxonase 2                                                         |
| 10940  | POP1     | POP1 homolog, ribonuclease P/MRP subunit                              |
| 5451   | POU2F1   | POU class 2 homeobox 1                                                |
| 23759  | PPIL2    | peptidylprolyl isomerase (cyclophilin)-like 2                         |
| 8493   | PPM1D    | protein phosphatase, Mg <sup>2+</sup> /Mn <sup>2+</sup> dependent, 1D |
| 5499   | PPP1CA   | protein phosphatase 1, catalytic subunit, alpha isozyme               |
| 26051  | PPP1R16B | protein phosphatase 1, regulatory subunit 16B                         |
| 5515   | PPP2CA   | protein phosphatase 2, catalytic subunit, alpha isozyme               |
| 5520   | PPP2R2A  | protein phosphatase 2, regulatory subunit B, alpha                    |
| 55012  | PPP2R3C  | protein phosphatase 2, regulatory subunit B'', gamma                  |
| 5533   | PPP3CC   | protein phosphatase 3, catalytic subunit, gamma isozyme               |
| 5536   | PPP5C    | protein phosphatase 5, catalytic subunit                              |
| 5537   | PPP6C    | protein phosphatase 6, catalytic subunit                              |



|        |           |                                                                          |
|--------|-----------|--------------------------------------------------------------------------|
| 5546   | PRCC      | papillary renal cell carcinoma (translocation-associated)                |
| 10113  | PREB      | prolactin regulatory element binding                                     |
| 80243  | PREX2     | phosphatidylinositol-3,4,5-trisphosphate-dependent Rac exchange factor 2 |
| 144165 | PRICKLE1  | prickle homolog 1                                                        |
| 5567   | PRKACB    | protein kinase, cAMP-dependent, catalytic, beta                          |
| 5578   | PRKCA     | protein kinase C, alpha                                                  |
| 5580   | PRKCD     | protein kinase C, delta                                                  |
| 79706  | PRKRIP1   | PRKR interacting protein 1 (IL11 inducible)                              |
| 5629   | PROX1     | prospero homeobox 1                                                      |
| 9128   | PRPF4     | pre-mRNA processing factor 4                                             |
| 5657   | PRTN3     | proteinase 3                                                             |
| 5663   | PSEN1     | presenilin 1                                                             |
| 5690   | PSMB2     | proteasome (prosome, macropain) subunit, beta type, 2                    |
| 5705   | PSMC5     | proteasome (prosome, macropain) 26S subunit, ATPase, 5                   |
| 5708   | PSMD2     | proteasome (prosome, macropain) 26S subunit, non-ATPase, 2               |
| 5725   | PTBP1     | polypyrimidine tract binding protein 1                                   |
| 5728   | PTEN      | phosphatase and tensin homolog                                           |
| 5747   | PTK2      | protein tyrosine kinase 2                                                |
| 2185   | PTK2B     | protein tyrosine kinase 2 beta                                           |
| 5764   | PTN       | pleiotrophin                                                             |
| 5770   | PTPN1     | protein tyrosine phosphatase, non-receptor type 1                        |
| 5781   | PTPN11    | protein tyrosine phosphatase, non-receptor type 11                       |
| 5777   | PTPN6     | protein tyrosine phosphatase, non-receptor type 6                        |
| 5788   | PTPRC     | protein tyrosine phosphatase, receptor type, C                           |
| 5802   | PTPRS     | protein tyrosine phosphatase, receptor type, S                           |
| 5803   | PTPRZ1    | protein tyrosine phosphatase, receptor-type, Z polypeptide 1             |
| 54899  | PXK       | PX domain containing serine/threonine kinase                             |
| 5829   | PXN       | paxillin                                                                 |
| 80223  | RAB11FIP1 | RAB11 family interacting protein 1 (class I)                             |
| 26056  | RAB11FIP5 | RAB11 family interacting protein 5 (class I)                             |

|        |        |                                                           |
|--------|--------|-----------------------------------------------------------|
| 5872   | RAB13  | RAB13, member RAS oncogene family                         |
| 22931  | RAB18  | RAB18, member RAS oncogene family                         |
| 57111  | RAB25  | RAB25, member RAS oncogene family                         |
| 83452  | RAB33B | RAB33B, member RAS oncogene family                        |
| 83871  | RAB34  | RAB34, member RAS oncogene family                         |
| 23682  | RAB38  | RAB38, member RAS oncogene family                         |
| 5865   | RAB3B  | RAB3B, member RAS oncogene family                         |
| 5868   | RAB5A  | RAB5A, member RAS oncogene family                         |
| 5869   | RAB5B  | RAB5B, member RAS oncogene family                         |
| 5878   | RAB5C  | RAB5C, member RAS oncogene family                         |
| 51560  | RAB6B  | RAB6B, member RAS oncogene family                         |
| 7879   | RAB7A  | RAB7A, member RAS oncogene family                         |
| 4218   | RAB8A  | RAB8A, member RAS oncogene family                         |
| 5877   | RABIF  | RAB interacting factor                                    |
| 55698  | RADIL  | Ras association and DIL domains                           |
| 8480   | RAE1   | ribonucleic acid export 1                                 |
| 135250 | RAET1E | retinoic acid early transcript 1E                         |
| 353091 | RAET1G | retinoic acid early transcript 1G                         |
| 5894   | RAF1   | Raf-1 proto-oncogene, serine/threonine kinase             |
| 10928  | RALBP1 | ralA binding protein 1                                    |
| 10267  | RAMP1  | receptor (G protein-coupled) activity modifying protein 1 |
| 10268  | RAMP3  | receptor (G protein-coupled) activity modifying protein 3 |
| 5901   | RAN    | RAN, member RAS oncogene family                           |
| 10048  | RANBP9 | RAN binding protein 9                                     |
| 5911   | RAP2A  | RAP2A, member of RAS oncogene family                      |
| 23551  | RASD2  | RASD family, member 2                                     |
| 51285  | RASL12 | RAS-like, family 12                                       |
| 9821   | RB1CC1 | RB1-inducible coiled-coil 1                               |
| 10616  | RBCK1  | RanBP-type and C3HC4-type zinc finger containing 1        |
| 55131  | RBM28  | RNA binding motif protein 28                              |

|        |        |                                                                          |
|--------|--------|--------------------------------------------------------------------------|
| 11030  | RBPMS  | RNA binding protein with multiple splicing                               |
| 5979   | RET    | ret proto-oncogene                                                       |
| 91869  | RFT1   | RFT1 homolog                                                             |
| 6002   | RGS12  | regulator of G-protein signaling 12                                      |
| 10287  | RGS19  | regulator of G-protein signaling 19                                      |
| 6009   | RHEB   | Ras homolog enriched in brain                                            |
| 121268 | RHEBL1 | Ras homolog enriched in brain like 1                                     |
| 387    | RHOA   | ras homolog family member A                                              |
| 29984  | RHOD   | ras homolog family member D                                              |
| 391    | RHOG   | ras homolog family member G                                              |
| 399    | RHOH   | ras homolog family member H                                              |
| 57381  | RHOJ   | ras homolog family member J                                              |
| 85415  | RHPN2  | rhophilin, Rho GTPase binding protein 2                                  |
| 8737   | RIPK1  | receptor (TNFRSF)-interacting serine-threonine kinase 1                  |
| 55005  | RMND1  | required for meiotic nuclear division 1 homolog ( <i>S. cerevisiae</i> ) |
| 55819  | RNF130 | ring finger protein 130                                                  |
| 81847  | RNF146 | ring finger protein 146                                                  |
| 81790  | RNF170 | ring finger protein 170                                                  |
| 6045   | RNF2   | ring finger protein 2                                                    |
| 54476  | RNF216 | ring finger protein 216                                                  |
| 55072  | RNF31  | ring finger protein 31                                                   |
| 9810   | RNF40  | ring finger protein 40, E3 ubiquitin protein ligase                      |
| 6048   | RNF5   | ring finger protein 5, E3 ubiquitin protein ligase                       |
| 9025   | RNF8   | ring finger protein 8, E3 ubiquitin protein ligase                       |
| 10921  | RNPS1  | RNA binding protein S1, serine-rich domain                               |
| 6095   | RORA   | RAR-related orphan receptor A                                            |
| 6098   | ROS1   | ROS proto-oncogene 1 , receptor tyrosine kinase                          |
| 6117   | RPA1   | replication protein A1, 70kDa                                            |
| 6118   | RPA2   | replication protein A2, 32kDa                                            |
| 6119   | RPA3   | replication protein A3, 14kDa                                            |

|        |          |                                                          |
|--------|----------|----------------------------------------------------------|
| 79657  | RPAP3    | RNA polymerase II associated protein 3                   |
| 23322  | RPGRIP1L | RPGRIP1-like                                             |
| 6132   | RPL8     | ribosomal protein L8                                     |
| 6222   | RPS18    | ribosomal protein S18                                    |
| 6233   | RPS27A   | ribosomal protein S27a                                   |
| 6197   | RPS6KA3  | ribosomal protein S6 kinase, 90kDa, polypeptide 3        |
| 22800  | RRAS2    | related RAS viral (r-ras) oncogene homolog 2             |
| 10692  | RRH      | retinal pigment epithelium-derived rhodopsin homolog     |
| 23076  | RRP1B    | ribosomal RNA processing 1B                              |
| 284654 | RSPO1    | R-spondin 1                                              |
| 6242   | RTKN     | rhotekin                                                 |
| 57142  | RTN4     | reticulon 4                                              |
| 84816  | RTN4IP1  | reticulon 4 interacting protein 1                        |
| 65078  | RTN4R    | reticulon 4 receptor                                     |
| 8607   | RUVBL1   | RuvB-like AAA ATPase 1                                   |
| 6256   | RXRA     | retinoid X receptor, alpha                               |
| 6259   | RYK      | receptor-like tyrosine kinase                            |
| 9294   | S1PR2    | sphingosine-1-phosphate receptor 2                       |
| 1903   | S1PR3    | sphingosine-1-phosphate receptor 3                       |
| 113174 | SAAL1    | serum amyloid A-like 1                                   |
| 22908  | SACM1L   | SAC1 suppressor of actin mutations 1-like (yeast)        |
| 142891 | SAMD8    | sterile alpha motif domain containing 8                  |
| 23328  | SASH1    | SAM and SH3 domain containing 1                          |
| 54440  | SASH3    | SAM and SH3 domain containing 3                          |
| 112483 | SAT2     | spermidine/spermine N1-acetyltransferase family member 2 |
| 81846  | SBF2     | SET binding factor 2                                     |
| 23256  | SCFD1    | sec1 family domain containing 1                          |
| 7857   | SCG2     | secretogranin II                                         |
| 6386   | SDCBP    | syndecan binding protein (syntenin)                      |
| 9919   | SEC16A   | SEC16 homolog A (S. cerevisiae)                          |

|        |          |                                                                                                                  |
|--------|----------|------------------------------------------------------------------------------------------------------------------|
| 29927  | SEC61A1  | Sec61 alpha 1 subunit ( <i>S. cerevisiae</i> )                                                                   |
| 6400   | SEL1L    | sel-1 suppressor of lin-12-like ( <i>C. elegans</i> )                                                            |
| 6403   | SELP     | selectin P (granule membrane protein 140kDa, antigen CD62)                                                       |
| 6404   | SELPLG   | selectin P ligand                                                                                                |
| 54910  | SEMA4C   | sema domain, immunoglobulin domain (Ig), transmembrane domain (TM) and short cytoplasmic domain, (semaphorin) 4C |
| 26168  | SENP3    | SUMO1/sentrin/SMT3 specific peptidase 3                                                                          |
| 710    | SERPING1 | serpin peptidase inhibitor, clade G (C1 inhibitor), member 1                                                     |
| 94097  | SFXN5    | sideroflexin 5                                                                                                   |
| 6449   | SGTA     | small glutamine-rich tetratricopeptide repeat (TPR)-containing, alpha                                            |
| 54557  | SGTB     | small glutamine-rich tetratricopeptide repeat (TPR)-containing, beta                                             |
| 25970  | SH2B1    | SH2B adaptor protein 1                                                                                           |
| 23677  | SH3BP4   | SH3-domain binding protein 4                                                                                     |
| 30011  | SH3KBP1  | SH3-domain kinase binding protein 1                                                                              |
| 285590 | SH3PXD2B | SH3 and PX domains 2B                                                                                            |
| 81858  | SHARPIN  | SHANK-associated RH domain interactor                                                                            |
| 6461   | SHB      | Src homology 2 domain containing adaptor protein B                                                               |
| 6464   | SHC1     | SHC (Src homology 2 domain containing) transforming protein 1                                                    |
| 53358  | SHC3     | SHC (Src homology 2 domain containing) transforming protein 3                                                    |
| 90525  | SHF      | Src homology 2 domain containing F                                                                               |
| 23408  | SIRT5    | sirtuin 5                                                                                                        |
| 8935   | SKAP2    | src kinase associated phosphoprotein 2                                                                           |
| 6497   | SKI      | SKI proto-oncogene                                                                                               |
| 6498   | SKIL     | SKI-like proto-oncogene                                                                                          |
| 114789 | SLC25A25 | solute carrier family 25 (mitochondrial carrier; phosphate carrier), member 25                                   |
| 293    | SLC25A6  | solute carrier family 25 (mitochondrial carrier; adenine nucleotide translocator), member 6                      |
| 148867 | SLC30A7  | solute carrier family 30 (zinc transporter), member 7                                                            |
| 27173  | SLC39A1  | solute carrier family 39 (zinc transporter), member 1                                                            |
| 9368   | SLC9A3R1 | solute carrier family 9, subfamily A (NHE3, cation proton antiporter 3), member 3 regulator 1                    |
| 10569  | SLU7     | SLU7 splicing factor homolog ( <i>S. cerevisiae</i> )                                                            |
| 4086   | SMAD1    | SMAD family member 1                                                                                             |

|        |         |                                                                                                   |
|--------|---------|---------------------------------------------------------------------------------------------------|
| 4087   | SMAD2   | SMAD family member 2                                                                              |
| 4088   | SMAD3   | SMAD family member 3                                                                              |
| 4089   | SMAD4   | SMAD family member 4                                                                              |
| 4091   | SMAD6   | SMAD family member 6                                                                              |
| 4092   | SMAD7   | SMAD family member 7                                                                              |
| 6604   | SMARCD3 | SWI/SNF related, matrix associated, actin dependent regulator of chromatin, subfamily d, member 3 |
| 9887   | SMG7    | SMG7 nonsense mediated mRNA decay factor                                                          |
| 55512  | SMPD3   | sphingomyelin phosphodiesterase 3, neutral membrane (neutral sphingomyelinase II)                 |
| 57154  | SMURF1  | SMAD specific E3 ubiquitin protein ligase 1                                                       |
| 64750  | SMURF2  | SMAD specific E3 ubiquitin protein ligase 2                                                       |
| 6640   | SNTA1   | syntrophin, alpha 1                                                                               |
| 54212  | SNTG1   | syntrophin, gamma 1                                                                               |
| 6642   | SNX1    | sorting nexin 1                                                                                   |
| 29916  | SNX11   | sorting nexin 11                                                                                  |
| 9784   | SNX17   | sorting nexin 17                                                                                  |
| 6643   | SNX2    | sorting nexin 2                                                                                   |
| 81609  | SNX27   | sorting nexin family member 27                                                                    |
| 8723   | SNX4    | sorting nexin 4                                                                                   |
| 58533  | SNX6    | sorting nexin 6                                                                                   |
| 8651   | SOCS1   | suppressor of cytokine signaling 1                                                                |
| 9021   | SOCS3   | suppressor of cytokine signaling 3                                                                |
| 9306   | SOCS6   | suppressor of cytokine signaling 6                                                                |
| 114815 | SORCS1  | sortilin-related VPS10 domain containing receptor 1                                               |
| 6653   | SORL1   | sortilin-related receptor, L(DLR class) A repeats containing                                      |
| 6272   | SORT1   | sortilin 1                                                                                        |
| 80320  | SP6     | Sp6 transcription factor                                                                          |
| 8404   | SPARCL1 | SPARC-like 1 (hevin)                                                                              |
| 10653  | SPINT2  | serine peptidase inhibitor, Kunitz type, 2                                                        |
| 6695   | SPOCK1  | sparc/osteonectin, cwcv and kazal-like domains proteoglycan (testican) 1                          |
| 6696   | SPP1    | secreted phosphoprotein 1                                                                         |

|        |         |                                                                                  |
|--------|---------|----------------------------------------------------------------------------------|
| 84888  | SPPL2A  | signal peptide peptidase like 2A                                                 |
| 6711   | SPTBN1  | spectrin, beta, non-erythrocytic 1                                               |
| 6712   | SPTBN2  | spectrin, beta, non-erythrocytic 2                                               |
| 8878   | SQSTM1  | sequestosome 1                                                                   |
| 6714   | SRC     | SRC proto-oncogene, non-receptor tyrosine kinase                                 |
| 6721   | SREBF2  | sterol regulatory element binding transcription factor 2                         |
| 57522  | SRGAP1  | SLIT-ROBO Rho GTPase activating protein 1                                        |
| 6732   | SRPK1   | SRSF protein kinase 1                                                            |
| 6733   | SRPK2   | SRSF protein kinase 2                                                            |
| 6427   | SRSF2   | serine/arginine-rich splicing factor 2                                           |
| 54961  | SSH3    | slingshot protein phosphatase 3                                                  |
| 6745   | SSR1    | signal sequence receptor, alpha                                                  |
| 6767   | ST13    | suppression of tumorigenicity 13 (colon carcinoma) (Hsp70 interacting protein)   |
| 8027   | STAM    | signal transducing adaptor molecule (SH3 domain and ITAM motif) 1                |
| 10617  | STAMBP  | STAM binding protein                                                             |
| 6772   | STAT1   | signal transducer and activator of transcription 1, 91kDa                        |
| 6774   | STAT3   | signal transducer and activator of transcription 3 (acute-phase response factor) |
| 6776   | STAT5A  | signal transducer and activator of transcription 5A                              |
| 6777   | STAT5B  | signal transducer and activator of transcription 5B                              |
| 140901 | STK35   | serine/threonine kinase 35                                                       |
| 11171  | STRAP   | serine/threonine kinase receptor associated protein                              |
| 10273  | STUB1   | STIP1 homology and U-box containing protein 1, E3 ubiquitin protein ligase       |
| 9482   | STX8    | syntaxin 8                                                                       |
| 51657  | STYXL1  | serine/threonine/tyrosine interacting-like 1                                     |
| 6840   | SVIL    | supervillin                                                                      |
| 258010 | SVIP    | small VCP/p97-interacting protein                                                |
| 6850   | SYK     | spleen tyrosine kinase                                                           |
| 10492  | SYNCRIP | synaptotagmin binding, cytoplasmic RNA interacting protein                       |
| 163183 | SYNE4   | spectrin repeat containing, nuclear envelope family member 4                     |
| 10454  | TAB1    | TGF-beta activated kinase 1/MAP3K7 binding protein 1                             |

|        |          |                                                                                                      |
|--------|----------|------------------------------------------------------------------------------------------------------|
| 23118  | TAB2     | TGF-beta activated kinase 1/MAP3K7 binding protein 2                                                 |
| 132001 | TAMM41   | TAM41, mitochondrial translocator assembly and maintenance protein, homolog ( <i>S. cerevisiae</i> ) |
| 57533  | TBC1D14  | TBC1 domain family, member 14                                                                        |
| 79735  | TBC1D17  | TBC1 domain family, member 17                                                                        |
| 29110  | TBK1     | TANK-binding kinase 1                                                                                |
| 9519   | TBPL1    | TBP-like 1                                                                                           |
| 10312  | TCIRG1   | T-cell, immune regulator 1, ATPase, H <sup>+</sup> transporting, lysosomal V0 subunit A3             |
| 6949   | TCOF1    | Treacher Collins-Franceschetti syndrome 1                                                            |
| 26123  | TCTN3    | tectonic family member 3                                                                             |
| 6997   | TDGF1    | teratocarcinoma-derived growth factor 1                                                              |
| 7006   | TEC      | tec protein tyrosine kinase                                                                          |
| 7018   | TF       | transferrin                                                                                          |
| 7022   | TFAP2C   | transcription factor AP-2 gamma (activating enhancer binding protein 2 gamma)                        |
| 7037   | TFRC     | transferrin receptor                                                                                 |
| 7040   | TGFB1    | transforming growth factor, beta 1                                                                   |
| 7042   | TGFB2    | transforming growth factor, beta 2                                                                   |
| 7043   | TGFB3    | transforming growth factor, beta 3                                                                   |
| 7046   | TGFBR1   | transforming growth factor, beta receptor 1                                                          |
| 7048   | TGFBR2   | transforming growth factor, beta receptor II (70/80kDa)                                              |
| 9392   | TGFBRAP1 | transforming growth factor, beta receptor associated protein 1                                       |
| 7057   | THBS1    | thrombospondin 1                                                                                     |
| 8563   | THOC5    | THO complex 5                                                                                        |
| 353376 | TICAM2   | toll-like receptor adaptor molecule 2                                                                |
| 114609 | TIRAP    | toll-interleukin 1 receptor (TIR) domain containing adaptor protein                                  |
| 7094   | TLN1     | talin 1                                                                                              |
| 7099   | TLR4     | toll-like receptor 4                                                                                 |
| 51284  | TLR7     | toll-like receptor 7                                                                                 |
| 80213  | TM2D3    | TM2 domain containing 3                                                                              |
| 10548  | TM9SF1   | transmembrane 9 superfamily member 1                                                                 |
| 11018  | TMED1    | transmembrane emp24 protein transport domain containing 1                                            |



|           |              |                                                          |
|-----------|--------------|----------------------------------------------------------|
| 100302736 | TMED7-TICAM2 | TMED7-TICAM2 readthrough                                 |
| 153396    | TMEM161B     | transmembrane protein 161B                               |
| 84187     | TMEM164      | transmembrane protein 164                                |
| 200728    | TMEM17       | transmembrane protein 17                                 |
| 51259     | TMEM216      | transmembrane protein 216                                |
| 79583     | TMEM231      | transmembrane protein 231                                |
| 91304     | TMEM259      | transmembrane protein 259                                |
| 55754     | TMEM30A      | transmembrane protein 30A                                |
| 55116     | TMEM39B      | transmembrane protein 39B                                |
| 252839    | TMEM9        | transmembrane protein 9                                  |
| 643853    | TMPPE        | transmembrane protein with metallophosphoesterase domain |
| 3371      | TNC          | tenascin C                                               |
| 7124      | TNF          | tumor necrosis factor                                    |
| 7128      | TNFAIP3      | tumor necrosis factor, alpha-induced protein 3           |
| 23495     | TNFRSF13B    | tumor necrosis factor receptor superfamily, member 13B   |
| 115650    | TNFRSF13C    | tumor necrosis factor receptor superfamily, member 13C   |
| 7132      | TNFRSF1A     | tumor necrosis factor receptor superfamily, member 1A    |
| 7133      | TNFRSF1B     | tumor necrosis factor receptor superfamily, member 1B    |
| 10673     | TNFSF13B     | tumor necrosis factor (ligand) superfamily, member 13b   |
| 8744      | TNFSF9       | tumor necrosis factor (ligand) superfamily, member 9     |
| 10318     | TNIP1        | TNFAIP3 interacting protein 1                            |
| 8711      | TNK1         | tyrosine kinase, non-receptor, 1                         |
| 10188     | TNK2         | tyrosine kinase, non-receptor, 2                         |
| 7138      | TNNT1        | troponin T type 1 (skeletal, slow)                       |
| 23534     | TNPO3        | transportin 3                                            |
| 7143      | TNR          | tenascin R                                               |
| 27327     | TNRC6A       | trinucleotide repeat containing 6A                       |
| 23371     | TNS2         | tensin 2                                                 |
| 54472     | TOLLIP       | toll interacting protein                                 |

|        |          |                                                                    |
|--------|----------|--------------------------------------------------------------------|
| 7157   | TP53     | tumor protein p53                                                  |
| 7168   | TPM1     | tropomyosin 1 (alpha)                                              |
| 8717   | TRADD    | TNFRSF1A-associated via death domain                               |
| 7185   | TRAF1    | TNF receptor-associated factor 1                                   |
| 7186   | TRAF2    | TNF receptor-associated factor 2                                   |
| 7187   | TRAF3    | TNF receptor-associated factor 3                                   |
| 26146  | TRAF3IP1 | TNF receptor-associated factor 3 interacting protein 1             |
| 10758  | TRAF3IP2 | TRAF3 interacting protein 2                                        |
| 9618   | TRAF4    | TNF receptor-associated factor 4                                   |
| 7189   | TRAF6    | TNF receptor-associated factor 6, E3 ubiquitin protein ligase      |
| 10131  | TRAP1    | TNF receptor-associated protein 1                                  |
| 11078  | TRIOBP   | TRIO and F-actin binding protein                                   |
| 7205   | TRIP6    | thyroid hormone receptor interactor 6                              |
| 7220   | TRPC1    | transient receptor potential cation channel, subfamily C, member 1 |
| 8848   | TSC22D1  | TSC22 domain family, member 1                                      |
| 80746  | TSEN2    | TSEN2 tRNA splicing endonuclease subunit                           |
| 7257   | TSNAX    | translin-associated factor X                                       |
| 23555  | TSPAN15  | tetraspanin 15                                                     |
| 26262  | TSPAN17  | tetraspanin 17                                                     |
| 10099  | TSPAN3   | tetraspanin 3                                                      |
| 83942  | TSSK1B   | testis-specific serine kinase 1B                                   |
| 283629 | TSSK4    | testis-specific serine kinase 4                                    |
| 7265   | TTC1     | tetratricopeptide repeat domain 1                                  |
| 55761  | TTC17    | tetratricopeptide repeat domain 17                                 |
| 55622  | TTC27    | tetratricopeptide repeat domain 27                                 |
| 22996  | TTC39A   | tetratricopeptide repeat domain 39A                                |
| 79183  | TTPAL    | tocopherol (alpha) transfer protein-like                           |
| 80727  | TTYH3    | tweety family member 3                                             |
| 84790  | TUBA1C   | tubulin, alpha 1c                                                  |
| 203068 | TUBB     | tubulin, beta class I                                              |

|        |         |                                                                |
|--------|---------|----------------------------------------------------------------|
| 51061  | TXNDC11 | thioredoxin domain containing 11                               |
| 84817  | TXNDC17 | thioredoxin domain containing 17                               |
| 7297   | TYK2    | tyrosine kinase 2                                              |
| 7301   | TYRO3   | TYRO3 protein tyrosine kinase                                  |
| 7305   | TYROBP  | TYRO protein tyrosine kinase binding protein                   |
| 55075  | UACA    | uveal autoantigen with coiled-coil domains and ankyrin repeats |
| 6675   | UAP1    | UDP-N-acetylglucosamine pyrophosphorylase 1                    |
| 7311   | UBA52   | ubiquitin A-52 residue ribosomal protein fusion product 1      |
| 51271  | UBAP1   | ubiquitin associated protein 1                                 |
| 7314   | UBB     | ubiquitin B                                                    |
| 7316   | UBC     | ubiquitin C                                                    |
| 10537  | UBD     | ubiquitin D                                                    |
| 10477  | UBE2E3  | ubiquitin-conjugating enzyme E2E 3                             |
| 7334   | UBE2N   | ubiquitin-conjugating enzyme E2N                               |
| 65264  | UBE2Z   | ubiquitin-conjugating enzyme E2Z                               |
| 29979  | UBQLN1  | ubiquilin 1                                                    |
| 56893  | UBQLN4  | ubiquilin 4                                                    |
| 51035  | UBXN1   | UBX domain protein 1                                           |
| 7349   | UCN     | urocortin                                                      |
| 90226  | UCN2    | urocortin 2                                                    |
| 114131 | UCN3    | urocortin 3                                                    |
| 23376  | UFL1    | UFM1-specific ligase 1                                         |
| 55325  | UFSP2   | UFM1-specific peptidase 2                                      |
| 55757  | UGGT2   | UDP-glucose glycoprotein glucosyltransferase 2                 |
| 80328  | ULBP2   | UL16 binding protein 2                                         |
| 79465  | ULBP3   | UL16 binding protein 3                                         |
| 8633   | UNC5C   | unc-5 netrin receptor C                                        |
| 5976   | UPF1    | UPF1 regulator of nonsense transcripts homolog (yeast)         |
| 9875   | URB1    | URB1 ribosome biogenesis 1 homolog (S. cerevisiae)             |
| 9816   | URB2    | URB2 ribosome biogenesis 2 homolog (S. cerevisiae)             |

|        |          |                                                                               |
|--------|----------|-------------------------------------------------------------------------------|
| 7398   | USP1     | ubiquitin specific peptidase 1                                                |
| 8237   | USP11    | ubiquitin specific peptidase 11                                               |
| 9958   | USP15    | ubiquitin specific peptidase 15                                               |
| 84669  | USP32    | ubiquitin specific peptidase 32                                               |
| 7375   | USP4     | ubiquitin specific peptidase 4 (proto-oncogene)                               |
| 85015  | USP45    | ubiquitin specific peptidase 45                                               |
| 84135  | UTP15    | UTP15, U3 small nucleolar ribonucleoprotein, homolog ( <i>S. cerevisiae</i> ) |
| 10451  | VAV3     | vav 3 guanine nucleotide exchange factor                                      |
| 7412   | VCAM1    | vascular cell adhesion molecule 1                                             |
| 1462   | VCAN     | versican                                                                      |
| 7415   | VCP      | valosin containing protein                                                    |
| 79674  | VEPH1    | ventricular zone expressed PH domain-containing 1                             |
| 7431   | VIM      | vimentin                                                                      |
| 7432   | VIP      | vasoactive intestinal peptide                                                 |
| 7433   | VIPR1    | vasoactive intestinal peptide receptor 1                                      |
| 7434   | VIPR2    | vasoactive intestinal peptide receptor 2                                      |
| 154807 | VKORC1L1 | vitamin K epoxide reductase complex, subunit 1-like 1                         |
| 7436   | VLDLR    | very low density lipoprotein receptor                                         |
| 9730   | VPRBP    | Vpr (HIV-1) binding protein                                                   |
| 64601  | VPS16    | vacuolar protein sorting 16 homolog ( <i>S. cerevisiae</i> )                  |
| 738    | VPS51    | vacuolar protein sorting 51 homolog ( <i>S. cerevisiae</i> )                  |
| 7454   | WAS      | Wiskott-Aldrich syndrome                                                      |
| 64743  | WDR13    | WD repeat domain 13                                                           |
| 55339  | WDR33    | WD repeat domain 33                                                           |
| 80349  | WDR61    | WD repeat domain 61                                                           |
| 54663  | WDR74    | WD repeat domain 74                                                           |
| 8838   | WISP3    | WNT1 inducible signaling pathway protein 3                                    |
| 7473   | WNT3     | wingless-type MMTV integration site family, member 3                          |
| 11059  | WWP1     | WW domain containing E3 ubiquitin protein ligase 1                            |
| 11060  | WWP2     | WW domain containing E3 ubiquitin protein ligase 2                            |

|        |         |                                                                               |
|--------|---------|-------------------------------------------------------------------------------|
| 331    | XIAP    | X-linked inhibitor of apoptosis, E3 ubiquitin protein ligase                  |
| 64328  | XPO4    | exportin 4                                                                    |
| 7516   | XRCC2   | X-ray repair complementing defective repair in Chinese hamster cells 2        |
| 7517   | XRCC3   | X-ray repair complementing defective repair in Chinese hamster cells 3        |
| 8565   | YARS    | tyrosyl-tRNA synthetase                                                       |
| 4904   | YBX1    | Y box binding protein 1                                                       |
| 7525   | YES1    | YES proto-oncogene 1, Src family tyrosine kinase                              |
| 25844  | YIPF3   | Yip1 domain family, member 3                                                  |
| 7529   | YWHAB   | tyrosine 3-monooxygenase/tryptophan 5-monooxygenase activation protein, beta  |
| 10971  | YWHAQ   | tyrosine 3-monooxygenase/tryptophan 5-monooxygenase activation protein, theta |
| 7534   | YWHAZ   | tyrosine 3-monooxygenase/tryptophan 5-monooxygenase activation protein, zeta  |
| 7535   | ZAP70   | zeta-chain (TCR) associated protein kinase 70kDa                              |
| 7597   | ZBTB25  | zinc finger and BTB domain containing 25                                      |
| 56829  | ZC3HAV1 | zinc finger CCCH-type, antiviral 1                                            |
| 286128 | ZFP41   | ZFP41 zinc finger protein                                                     |
| 9372   | ZFYVE9  | zinc finger, FYVE domain containing 9                                         |
| 84146  | ZNF644  | zinc finger protein 644                                                       |
| 79724  | ZNF768  | zinc finger protein 768                                                       |
| 79364  | ZXDC    | ZXD family zinc finger C                                                      |
